# Supplementary material
Source: publisher figshare collection journal article supplement (https://acs.figshare.com/ndownloader/files/3956677)
Supplement: Supplementary file 1 [file 3956677]

# Energy Modeling of Electrochemical Anodization Process of Titanium Dioxide Nanotubes

*Bingbing Li<sup>1</sup>, Xianfeng Gao<sup>1</sup>, Hong-Chao Zhang<sup>2</sup>, Chris Yuan<sup>1\*</sup>*

<sup>1</sup>Department of Mechanical Engineering, University of Wisconsin-Milwaukee, Milwaukee, WI  
53211, United States

<sup>2</sup>Department of Industrial Engineering, Texas Tech University, Lubbock, TX 79409, United  
States

\*Corresponding author E-mail: cyuan@uwm.edu. Phone: +1 (414) 229-5639.

The supporting information includes the data used in the analysis and detailed calculations.

Experiment setup: 0.25mm titanium with 99.97% purity, electrolyte is glycerol (99.8%) with NH<sub>4</sub>F (98%) concentration in a range 0.1-0.7 wt%

Table S1 Enthalpy of formation and absolute entropy of substances used in the analysis of the chemical reaction processes

| Substance         | Phase *                 | Molecular weight<br>(kg/kmol) | $h_f^\circ$ kJ/mol | $S^\circ$ J/mol*K |
|-------------------|-------------------------|-------------------------------|--------------------|-------------------|
| TiCl <sub>4</sub> | Titan tetrachloride (g) | 189.678                       | -763.16            | 354.84            |
| H <sub>2</sub> O  | Water (g)               | 18.0153                       | -241.83            | 188.84            |
| TiO <sub>2</sub>  | Rutile Titan oxide (s)  | 79.866                        | -938.72            | 50.62             |
| TiO <sub>2</sub>  | Anatase Titan oxide (s) | 79.866                        | -938.72            | 49.82             |
| Ti                | Titanium (s)            | 47.867                        | 13.65              | 30.72             |
| HCl               | Hydrogen chloride (g)   | 36.4606                       | -92.31             | 186.90            |
| O <sub>2</sub>    | Oxygen(g)               | 31.9988                       | 0                  | 205.02            |
| Cl <sub>2</sub>   | Chlorine(g)             | 70.9054                       | 0                  | 223.08            |
| CH <sub>4</sub>   | Methane(g)              | 16.0425                       | -74.87             | 186.25            |
| C                 | Carbon (graphite) (s)   | 12.0107                       | 0                  | 5.686             |
| H <sub>2</sub>    | Hydrogen(g)             | 2.01588                       | 0                  | 130.68            |
| CO                | Carbon monoxide(g)      | 28.0101                       | -110.53            | 197.66            |
| CO <sub>2</sub>   | Carbon dioxide(g)       | 44.0095                       | -393.52            | 213.79            |
| F <sup>-</sup>    | Fluorine anion          | 18.9989                       | 79.39              | 158.78            |
| H <sup>+</sup>    | Hydrogen cation         | 1.00739                       | 1555               | 108.95            |
| TiF <sub>6</sub>  | Titanium fluoride       | 104.8637                      | -66.94             | 237.31            |

\*(g, gas; l, liquid; s, solid ), (NIST CSTL Standard Reference Data Program, Chemistry, T=25C, P= 1 bar)

### 1. Energy Analysis for Formation of Oxide Layer

The total overall entropy change for the overall process in kJ/mol\*K:

$$\Delta S_{\text{Reaction}} = \sum_{\text{Products}} \gamma_i S_i - \sum_{\text{Reactants}} \gamma_i S_i$$

$$\text{Where } S_i = S_i^\circ - R \ln \frac{P_i}{P_0}$$

$$\Delta S_{\text{Reaction}} = \sum_{\text{Products}} \gamma_i S_i - \sum_{\text{Reactants}} \gamma_i S_i = -96.42 \text{ J/mol} \cdot \text{K}$$

$$Q = \Delta H_{f, \text{Reaction}}^{\circ} = \sum_{\text{Products}} \gamma_i H_{fi}^{\circ} - \sum_{\text{Reactants}} \gamma_i H_{fi}^{\circ} = -468.71 \text{ kJ/mol}$$

$$Q_0 = -Q = 468.71 \text{ kJ/mol}$$

$$\Delta S_{\text{Surrounding}} = \frac{Q_0}{T_0} = 1570 \text{ J/mol} \cdot \text{K}$$

$$\Delta S_{\text{Total}} = \Delta S_{\text{Reaction}} + \Delta S_{\text{Surrounding}} = 1473.58 \frac{\text{J}}{\text{mol} \cdot \text{K}}$$

The reversible work associated with the process is:

$$w_{\text{rev}} = (H_R - T_0 S_R) - (H_P - T_0 S_P) = -Q - T_0(-\Delta S_R) = 439.98 \text{ kJ/mol}$$

For Ti itself, it is  $439.98 \text{ kJ} \cdot \text{mol}^{-1} / 79.867 \text{ g} \cdot \text{mol}^{-1} = 5.51 \text{ kJ/g}$ .

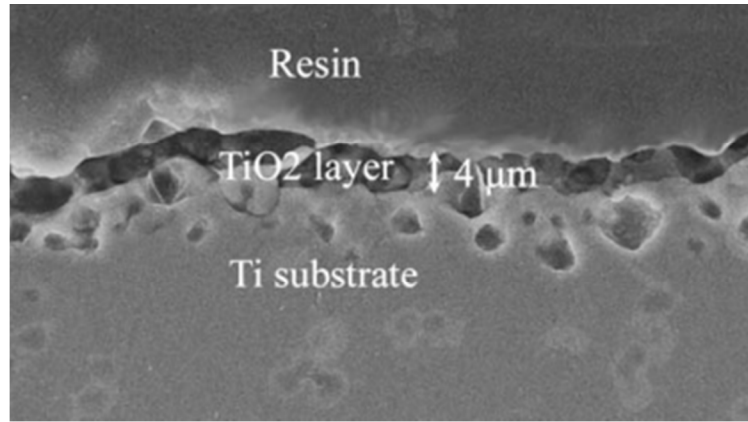

Figure S1 Cross sectional image of TiO<sub>2</sub>/Ti thick film electrode.

During the lab experiments, with 2 hours the anodization process generates 4 μm TiO<sub>2</sub> layer (illustrated in [Figure S1](#) ~~Figure 4~~), the volume is  $2 \times 1.27 \text{ cm} \times 2.54 \text{ cm} \times 4 \text{ μm} = 0.0025 \text{ cm}^3$ , the density is 3.82 g/cm<sup>3</sup>, and the total mass is 0.01528 g. The energy consumption in formation process of the oxide layer is calculated as follows:

$$E = 5.51 \text{ kJ/g} \times 0.01528 \text{ g} = 84.19 \text{ J}$$

## 2. Energy Analysis for Chemical Diffusion Process

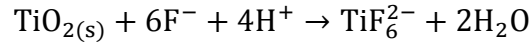

The total overall entropy change for the overall process is:

$$\begin{aligned}\Delta S_{\text{Reaction}} &= \sum_{\text{Products}} \gamma_i S_i - \sum_{\text{Reactants}} \gamma_i S_i = 246.44 + 384.42 - 50.62 - 978.16 - 466.27 \\ &= -864.19 \text{ J/mol} \cdot \text{K}\end{aligned}$$

$$Q = \Delta H_{\text{f, Reaction}}^\circ = \sum_{\text{Products}} \gamma_i H_{\text{fi}}^\circ - \sum_{\text{Reactants}} \gamma_i H_{\text{fi}}^\circ = -5831.88 \text{ kJ/mol}$$

$$Q_0 = -Q = 5831.88 \text{ kJ/mol}$$

$$\Delta S_{\text{Surrounding}} = \frac{Q_0}{T_0} = 19570 \text{ J/mol} \cdot \text{K}$$

$$\Delta S_{\text{Total}} = \Delta S_{\text{Reaction}} + \Delta S_{\text{Surrounding}} = 18705.81 \frac{\text{J}}{\text{mol} \cdot \text{K}}$$

The reversible work associated with the process is:

$$W_{\text{rev}} = (H_{\text{R}} - T_0 S_{\text{R}}) - (H_{\text{P}} - T_0 S_{\text{P}}) = -Q - T_0(-\Delta S_{\text{R}}) = 11406.21 \text{ kJ/mol}$$

For Ti itself, it is  $439.98 \text{ kJ/mol} / 79.867 \text{ g/mol} = 142.82 \text{ kJ/g}$ .

During the lab experiments, the total mass is 0.01528g as obtained above. The energy in chemical diffusion process is calculated as follows:

$$E = 142.82 \text{ kJ/g} \times 0.01528 \text{ g} = 2.18 \text{ kJ}$$

## 3. Energy Analysis of Physical Diffusion Process

Based on the experimental data, the TiO<sub>2</sub> nanotube diameter is 35nm, wall thickness is 9nm and length is 1100nm. So the porosity of nanotube is calculated as:

$$p = 1 - \text{volume fraction} = 1 - \frac{V_{\text{TiO}_2}}{V_{\text{Total}}} = \frac{d_i^2}{d_o^2} = 43.6\%$$

The anodic current density at 30V is calculated as:

$$I = \frac{43.6\% \times 4 \times 96485 \text{Cmol}^{-1} \times 10^{-5} \text{cm}^2 \text{s}^{-1} \times 2.5 \times 10^{-5} \text{mol cm}^{-3}}{1100 \text{nm} + 43.6\% \times 10300 \text{nm}} = 75 \text{ mA} \cdot \text{cm}^{-2}$$

The titanium sheet size is 1cm by 5cm, so the area is calculated as:

$$A = 1 \text{cm} \times 5 \text{cm} = 5 \text{cm}^2$$

The energy input into the diffusion process during 2 hours is calculated as:

$$E_{\text{diffusion}} = \Delta V \cdot I \cdot A \cdot t = 30 \text{V} \times 75 \text{mA} \cdot \text{cm}^{-2} \times 5 \text{cm}^2 \times 2 \text{h} = 0.0225 \text{kWh} = 81 \text{kJ}$$

#### 4. Energy Analysis for Calcination Process

In this closed calcination system volume is constant, so we can calculate the pressure by classic ideal gas law:

$$PV = nRT$$

$$\frac{P}{P_0} = \frac{T}{T_0} = \frac{723}{273} = 2.648$$

Where heat capacity

$$c_p = \frac{1.068 \text{kJ}}{\text{kg} \cdot \text{K}} \times \frac{28.97 \text{g}}{\text{mol}} = 30.94 \text{J/mol} \cdot \text{K}$$

The minimum physical exergy required to create the conditions necessary to crystallize  $\text{TiO}_2$  is calculated in the following:

$$b_{\text{ph}} = c_p(T - T_0) - c_p T_0 \ln \frac{T}{T_0} + T_0 R \ln \frac{P}{P_0} = 7.907 \text{kJ/mol}$$

$T_0 \dot{S}_{\text{gen}} = 0$ , and the minimum work of crystallization process is obtained as follows:

$$W_{\text{min}} = b_{\text{ph}} \cdot m = \frac{7.907 \text{kJ}}{\text{mol}} \times 17.78 \text{cm} \times 12.7 \text{cm} \times 25.4 \text{cm} \times \frac{0.524 \text{mol}}{\text{L}} = 23.76 \text{kJ}$$

## 5. LCI data for raw material upstream process:

The LCI data for upstream process includes cradle to gate data for raw materials: ethylene glycol, deionized water, ammonia, hydrogen fluoride, ammonium fluoride, titanium dioxide () and pure titanium foil.

Table S2 Energy requirement of 1kg ethylene glycol from ethane and oxygen via EO process.

| Inputs                           | Amount (MJ, net calorific value, German) |
|----------------------------------|------------------------------------------|
| Crude oil                        | 20.2                                     |
| Hard coal                        | 1.33                                     |
| Lignite                          | 1.66                                     |
| Natural gas                      | 11.4                                     |
| Oil sand (10% bitumen)           | 0.000387                                 |
| Oil sand (100% bitumen)          | 0.000338                                 |
| Peat                             | 0.00133                                  |
| Pit methane                      | 0.024                                    |
| Primary energy from geothermics  | 0.00172                                  |
| Primary energy from hydro power  | 0.194                                    |
| Primary energy from solar energy | 0.518                                    |
| Primary energy from wind power   | 0.394                                    |
| Secondary fuel                   | 0.00488                                  |
| Secondary fuel renewable         | 0.000466                                 |
| Uranium natural                  | 1.64                                     |
| Total                            | 37.36912                                 |

(PE International GaBi 6 Professional Database)

Table S3 Energy requirement of 1kg deionized water from ion exchange process.

| Inputs                           | Amount (MJ, net calorific value, German) |
|----------------------------------|------------------------------------------|
| Crude oil                        | 0.015                                    |
| Hard coal                        | 0.0128                                   |
| Lignite                          | 0.0131                                   |
| Natural gas                      | 0.0204                                   |
| Oil sand (10% bitumen)           | 0.00000257                               |
| Oil sand (100% bitumen)          | 0.00000224                               |
| Peat                             | 0.00000306                               |
| Pit methane                      | 0.000216                                 |
| Primary energy from geothermics  | 0.00000332                               |
| Primary energy from hydro power  | 0.00133                                  |
| Primary energy from solar energy | 0.00417                                  |
| Primary energy from wind power   | 0.00307                                  |
| Secondary fuel                   | 0.000114                                 |

|                          |           |
|--------------------------|-----------|
| Secondary fuel renewable | 0.0000109 |
| Uranium natural          | 0.0123    |
| Total                    | 0.082522  |

(PE International GaBi 6 Professional Database)

Table S4 Energy requirement of 1kg ammonia from Haber-Bosch process.

| Inputs                           | Amount (MJ, net calorific value, German) |
|----------------------------------|------------------------------------------|
| Crude oil                        | 0.274                                    |
| Hard coal                        | 0.959                                    |
| Lignite                          | 1.26                                     |
| Natural gas                      | 33.4                                     |
| Oil sand (10% bitumen)           | 0.000175                                 |
| Oil sand (100% bitumen)          | 0.000152                                 |
| Peat                             | 0.000169                                 |
| Pit methane                      | 0.0172                                   |
| Primary energy from geothermics  | 0.000161                                 |
| Primary energy from hydro power  | 0.127                                    |
| Primary energy from solar energy | 0.393                                    |
| Primary energy from wind power   | 0.296                                    |
| Secondary fuel                   | 0.00471                                  |
| Secondary fuel renewable         | 0.000448                                 |
| Uranium natural                  | 1.17                                     |
| Total                            | 37.90202                                 |

(PE International GaBi 6 Professional Database)

Table S5 Energy requirement of 1kg hydrogen fluoride from conversion of dried fluorspar.

| Inputs                           | Amount (MJ, net calorific value, German) |
|----------------------------------|------------------------------------------|
| Crude oil                        | 24                                       |
| Hard coal                        | 4.45                                     |
| Lignite                          | 1.44                                     |
| Natural gas                      | 8.7                                      |
| Oil sand (10% bitumen)           | 0.000215                                 |
| Oil sand (100% bitumen)          | 0.000188                                 |
| Peat                             | 0.00026                                  |
| Pit methane                      | 0.078                                    |
| Primary energy from geothermics  | 0.000304                                 |
| Primary energy from hydro power  | 0.175                                    |
| Primary energy from solar energy | 0.456                                    |
| Primary energy from wind power   | 0.337                                    |
| Secondary fuel                   | 0.004                                    |
| Secondary fuel renewable         | 0.000381                                 |
| Uranium natural                  | 1.51                                     |

|       |          |
|-------|----------|
| Total | 41.15135 |
|-------|----------|

(PE International GaBi 6 Professional Database)

The energy consumption of producing 1 kg of titanium foil by FCC Cambridge process is 20kWh.<sup>1</sup> Based on the mass flow of electrochemical anodization process, the total energy consumption of raw materials extraction and production (Ti foil, ethylene glycol, deionized water, and ammonia fluoride) required in experiment is approximately 3577.766kJ (234.147MJ/g)

Table S6 Energy consumption for raw material extraction and process

| Material         | Mass       | Energy consumption (kJ) |
|------------------|------------|-------------------------|
| Pure Ti foil     | 371.99mg   | 26.783                  |
| Ethylene glycol  | 94.6g      | 3535.119                |
| Ammonia fluoride | 0.4g       | 6.966                   |
| Deionized water  | 5g         | 8.898                   |
| Total            | 100.37199g | 3577.766                |

## References

1. Chen, G. Z.; Fray, D. J.; Farthing, T. W., Direct electrochemical reduction of titanium dioxide to titanium in molten calcium chloride. *Nature* **2000**, *407*, (6802), 361-364.
